# Supplementary material for: The Role of Endosongraphy in Cardiology: Clinical Applications
Source: Preprints.org preprint supplement (doi:10.20944/preprints202307.1290.v2), 2023-09-27
Supplement: Supplementary file 3 [file supplementary]

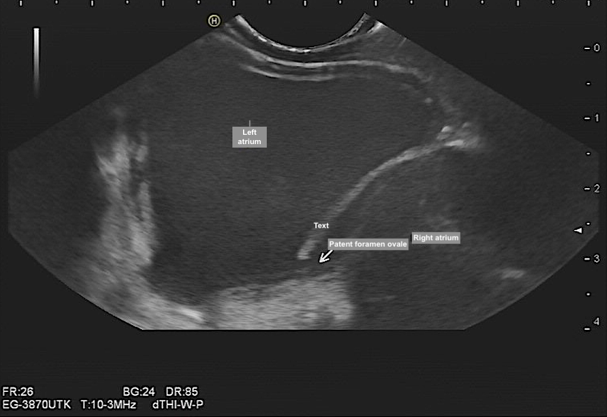


Supp. figure 1: Ultrasonographic ultrasound demonstrated the morphology of left atrium in one view and the relation to right atrium. Pattent foramen oval is incidentally detected.


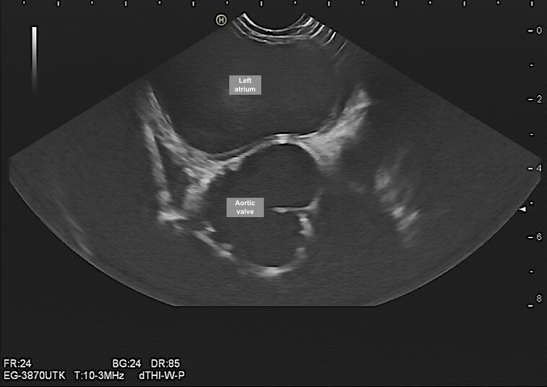


Supp. figure 2: Ultrasonographic ultrasound demonstrated the morphology of left atrium in another views and the relation to aortic valve.


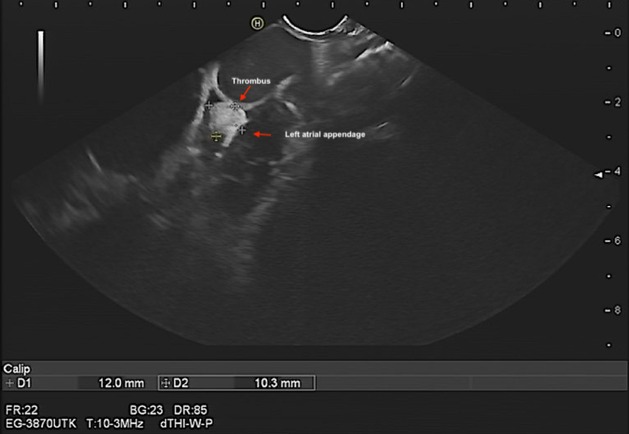


Supp.figure 3: Endosonographic ultrasound demonstrated the morphology and consistency of thrombus in left atrial appendage.


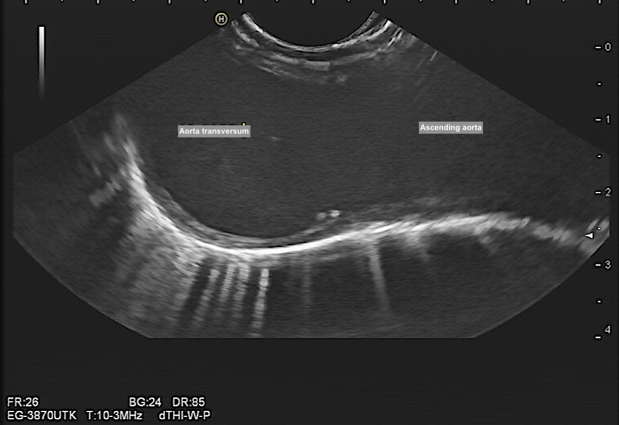


Supp. figure 4: Ultrasonographic ultrasound demonstrated the anatomy of ascending, and transversus aorta respectively.


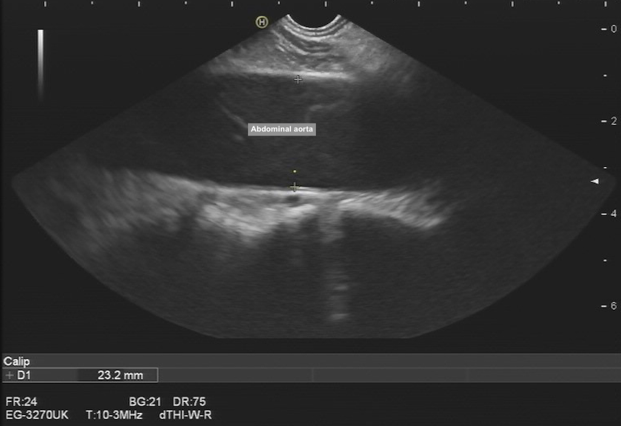


Supp. figure 5: Ultrasonographic ultrasound demonstrated the anatomy of abdominal aorta.


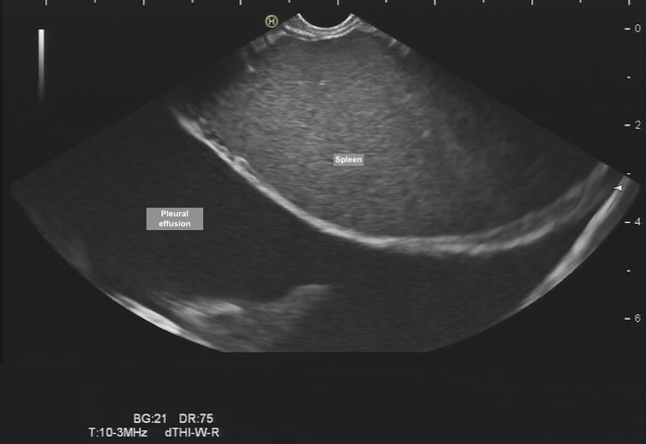


Supp. figure 6: Endosonographic ultrasound demonstrated a moderate left pleural effusion.


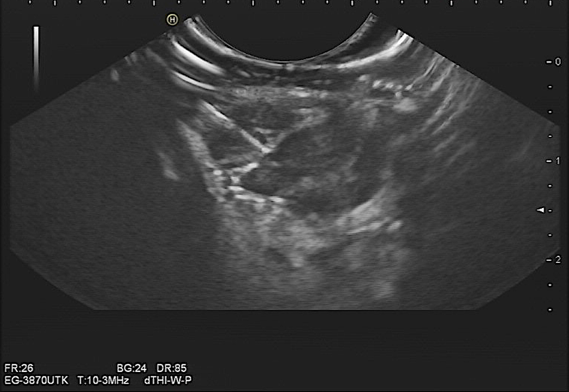


Supp. figure 7: Endosonographic ultrasound-guided punction and aspiration of lymph nodes.
